# Supplementary material for: Exploiting genotyping by sequencing to characterize the genomic structure of the American cranberry through high-density linkage mapping
Source: PubMed Central journal article supplement (PMC4906896; doi:10.1186/s12864-016-2802-3), 2016-06-13

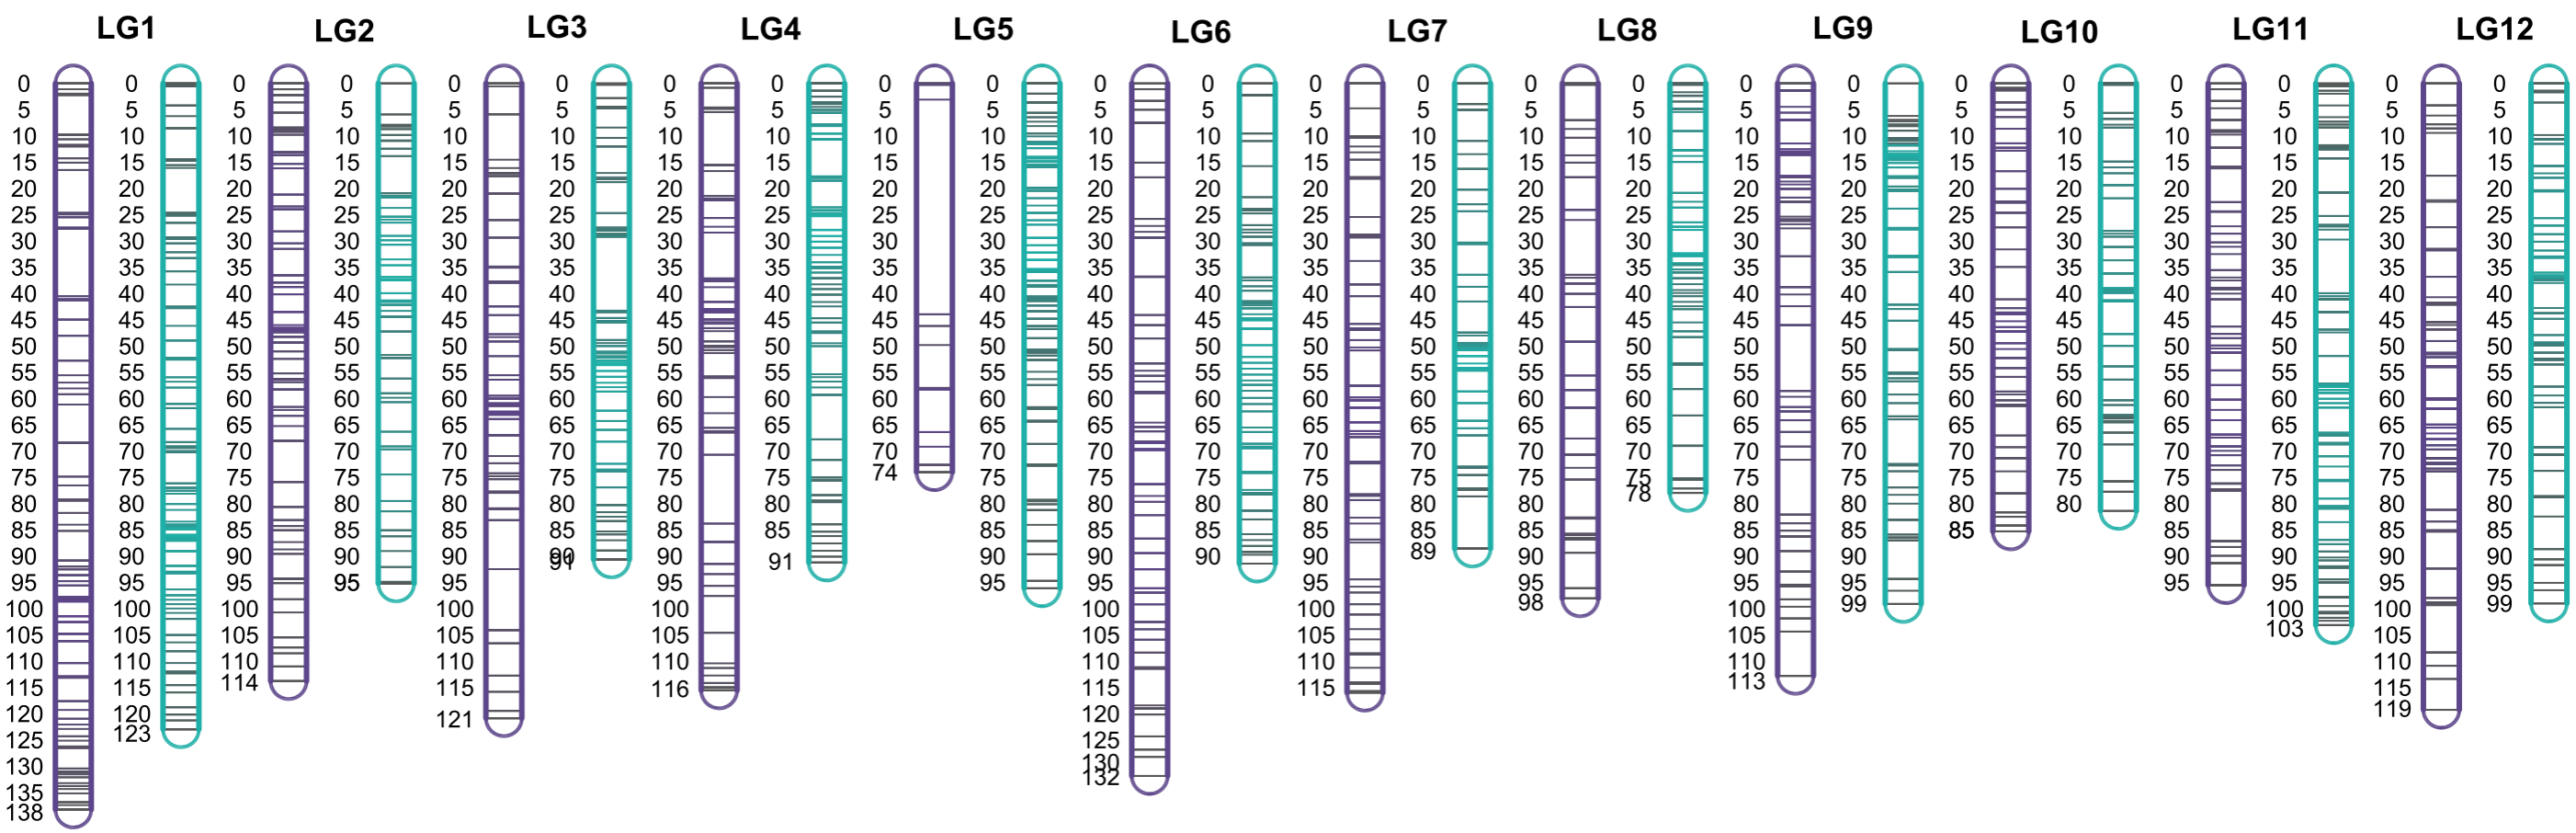

Supplement: 12864_2016_2802_MOESM2_ESM.pdf [file 12864_2016_2802_MOESM2_ESM.pdf]
